# Supplementary material for: Nemaline myopathy with scoliosis: a case report
Source: Frontiers journal article supplement (doi:10.3389/fped.2024.1413096), 2024-10-15
Supplement: Image_1.pdf [file Image_1.pdf]

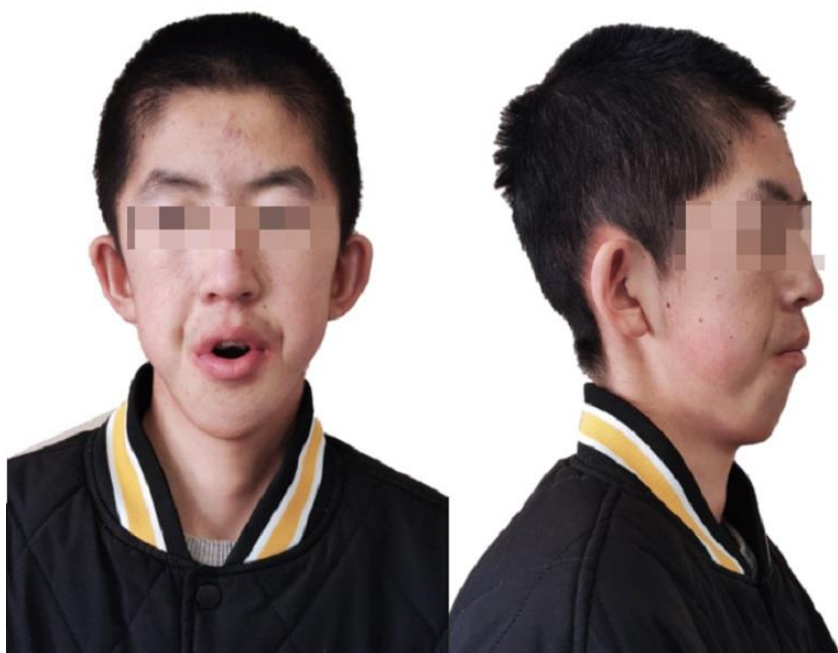

**Figure S1.** Facial characteristics: elongated facial structure, slender face shape, moderate length
